# Supplementary material for: Co nanoparticle-decorated pomelo-peel-derived carbon enabled high-efficiency electrocatalytic nitrate reduction to ammonia
Source: Royal Society of Chemistry journal article supplement (doi:10.1039/d2cc00952h), 2022-01-01
Supplement: d2cc00952h1.pdf [file d2cc00952h1.pdf]

## Electronic Supplementary Information

### Experimental Section

**Materials:** Sodium nitrate ( $\text{NaNO}_3$ , 99.0%), sodium nitrite ( $\text{NaNO}_2$ , 99.0%), ammonium chloride ( $\text{NH}_4\text{Cl}$ ), sodium hydroxide ( $\text{NaOH}$ ), sodium salicylate ( $\text{C}_7\text{H}_5\text{NaO}_3$ ), trisodium citrate dihydrate ( $\text{C}_6\text{H}_5\text{Na}_3\text{O}_7 \cdot 2\text{H}_2\text{O}$ ), p-dimethylaminobenzaldehyde ( $\text{C}_9\text{H}_{11}\text{NO}$ ), sodium nitroferricyanide dihydrate ( $\text{C}_5\text{FeN}_6\text{Na}_2\text{O} \cdot 2\text{H}_2\text{O}$ ), 0.8 wt% sulfamic acid solution ( $\text{H}_3\text{NO}_3\text{S}$ ), sodium dihydrogen phosphate dihydrate ( $\text{NaH}_2\text{PO}_4$ ), disodium hydrogen phosphate dodecahydrate ( $\text{Na}_2\text{HPO}_4$ ) and sodium hypochlorite solution ( $\text{NaClO}$ ) were purchased from Aladdin Ltd. (Shanghai, China). Cobalt acetate tetrahydrate [ $\text{Co}(\text{CH}_3\text{COO})_2 \cdot 4\text{H}_2\text{O}$ ], and ammonium chloride ( $\text{NH}_4\text{Cl}$ ) were purchased from Chengdu Kelong Chemical Regent Co. Ltd. Sulfuric acid ( $\text{H}_2\text{SO}_4$ ), hydrogen peroxide ( $\text{H}_2\text{O}_2$ ), hydrochloric acid ( $\text{HCl}$ ), hydrazine monohydrate ( $\text{N}_2\text{H}_4 \cdot \text{H}_2\text{O}$ ) and ethylalcohol ( $\text{C}_2\text{H}_5\text{OH}$ ) were bought from Beijing Chemical Corporation. (China). chemical Ltd. in Chengdu. Carbon paper was purchased from Qingyuan Metal Materials Co., Ltd (Xingtai, China). All reagents used in this work were analytical grade without further purification.

**Preparation of PP-Co:** In brief,  $\text{Co}(\text{CH}_3\text{COO})_2 \cdot 4\text{H}_2\text{O}$  was dissolved in 30 mL ultrapure water with the different concentrations of 0.1 M, 0.05 M, and 0.01 M, respectively. Then add 0.3 g pretreatment pomelo peel. After standing still for 6 h, the soaked pomelo peels were taken out and washed with distilled water, followed by drying at 60 °C overnight. After drying the soaked pomelo peels, the soaked pomelo peels were calcined at 800 °C for 2 h with a temperature rate of 2 °C  $\text{min}^{-1}$  under argon atmosphere, the resulting products are named PP-Co-0.1, PP-Co, PP-Co-0.01, respectively. The pure PP was obtained without adding  $\text{Co}(\text{CH}_3\text{COO})_2 \cdot 4\text{H}_2\text{O}$ .

**Characterizations:** XRD data were acquired by a LabX XRD-6100 X-ray diffractometer with a Cu  $K\alpha$  radiation (40 kV, 30 mA) of wavelength 0.154 nm (SHIMADZU, Japan). SEM measurements were carried out on a GeminiSEM 300 scanning electron microscope (ZEISS, Germany) at an accelerating voltage of 5 kV. XPS measurements were performed on an ESCALABMK II X-ray photoelectron

spectrometer using Mg as the exciting source. The absorbance data of spectrophotometer was measured on UV-Vis spectrophotometer. TEM image was obtained from a Zeiss Libra 200FE transmission electron microscope operated at 200 kV.

**Electrochemical measurements:** 10 mg of the catalyst and 40  $\mu\text{L}$  of 5 wt% Nafion were dispersed in 960  $\mu\text{L}$  of a deionized water/ethanol solution ( $v/v = 1:3$ ) by sonicating for 2 h to get a homogeneous catalyst ink. Then, a certain volume of the ink was dropped onto a  $1 \times 1$  cm carbon paper with a catalyst loading of  $0.2 \text{ mg cm}^{-2}$  and dried at room temperature. All electrochemical measurements were performed in a two-compartment cell separated by a treated Nafion 117 membrane using the CHI660E electrochemical workstation (Shanghai, Chenhua) with a standard three-electrode setup. Electrolyte solution was Ar-saturated 0.1 M NaOH with 0.1 M  $\text{NaNO}_3/\text{NaNO}_2$ , using PP-Co/CP ( $0.2 \text{ mg cm}^{-2}$ ) as the working electrode, a carbon rod as the counter electrode and a Hg/HgO as the reference electrode. All the potentials reported in our work were converted to reversible hydrogen electrode (RHE) scale via calibration with the following equation:  $E(\text{RHE}) = E(\text{vs. Hg/HgO}) + 0.0591 \times \text{pH} + 0.098 \text{ V}$  and the current density was normalized by the geometric surface area.

**Determination of  $\text{NH}_3$ :** Concentration of produced  $\text{NH}_3$  was determined by spectrophotometry measurement with indophenol blue method (the obtained electrolyte was diluted 50 times).<sup>1</sup> In detail, 2 mL of the diluted catholyte was obtained from the cathodic chamber and mixed with 2 mL of a 1 M NaOH solution that contained salicylic acid and sodium citrate. Then, 1 mL of 0.05 M NaClO and 0.2 mL of 1 wt%  $\text{C}_5\text{FeN}_6\text{Na}_2\text{O}$  were dropped in the collected electrolyte solution. After standing at room temperature for 2 h, the ultraviolet-visible absorption spectrum was measured. The concentration-absorbance curve was calibrated using the standard  $\text{NH}_4\text{Cl}$  solution with  $\text{NH}_3$  concentrations of 0, 0.2, 0.5, 1.0, 2.0, 0.25, and  $5.0 \mu\text{g mL}^{-1}$  in 0.1 M NaOH. The absorbance at 655 nm was measured to quantify the  $\text{NH}_3$  concentration using standard  $\text{NH}_4\text{Cl}$  solutions ( $y = 0.38775x + 0.05091$ ,  $R^2 = 0.999$ ).

**Determination of NO<sub>2</sub><sup>-</sup>:** Owing to the large concentration of solution, the obtained reaction solutions were diluted 50 times. The NO<sub>2</sub><sup>-</sup> concentration was analyzed using the Griess test.<sup>2</sup> The Griess reagent was prepared by dissolving 0.1 g N-(1-naphthyl) ethylenediamine dihydrochloride, 1.0 g sulfonamide and 2.94 mL H<sub>3</sub>PO<sub>4</sub> in 50 mL deionized water. In a typical colorimetric assay, the 1.0 mL Griess reagent was mixed with the 1.0 mL nitrite-containing solution and 2.0 mL H<sub>2</sub>O, and allowed to react at room temperature for 10 min, in which sulfonamide reacts with NO<sub>2</sub><sup>-</sup> to form a diazonium salt and then further reacts with amine to form an azo dye (magenta). The absorbance at 540 nm was measured to quantify the NO<sub>2</sub><sup>-</sup> concentration with a standard curve of NO<sub>2</sub><sup>-</sup> ( $y = 0.20276x + 0.33532$ ,  $R^2 = 0.999$ ).

**Determination of N<sub>2</sub>H<sub>4</sub>:** In this work, we used the method of Watt and Chrisp<sup>3</sup> to determined the concentration of produced N<sub>2</sub>H<sub>4</sub>. The chromogenic reagent was a mixed solution of 5.99 g C<sub>9</sub>H<sub>11</sub>NO, 30 mL HCl and 300 mL C<sub>2</sub>H<sub>5</sub>OH. In detail, 1 mL electrolyte was added into 1 mL prepared color reagent and stirred for 15 min in the dark. The absorbance at 455 nm was measured to quantify the N<sub>2</sub>H<sub>4</sub> concentration with a standard curve of hydrazine ( $y = 0.58194x + 0.04348$ ,  $R^2 = 0.999$ ).

**Calculations of the conversion rate, FE, and NH<sub>3</sub> yield rate:**

Equations of cathode reaction of NO<sub>2</sub><sup>-</sup>RR:

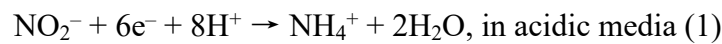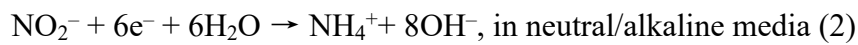

Equations of anode reaction:

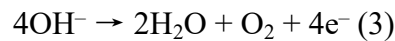

Possible overall reaction:

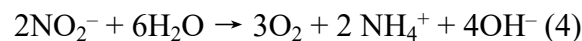

Equations of cathode reaction of NO<sub>3</sub><sup>-</sup>RR:

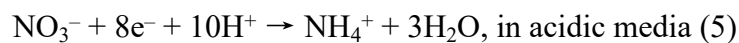

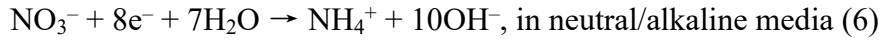

FE toward  $\text{NH}_3$  via  $\text{NO}_2^-$ -RR was calculated by equation:

$$\text{FE} = 6 \times F \times ([\text{NH}_4^+] \times V / M_{\text{NH}_4^+}) / Q \times 100\% \text{ (7)}$$

FE toward  $\text{NH}_3$  via  $\text{NO}_3^-$  reduction reaction ( $\text{NO}_3^-$ -RR) was calculated by equation:

$$\text{FE} = (8 \times F \times [\text{NH}_4^+] \times V) / (M_{\text{NH}_4^+} \times Q) \times 100\% \text{ (8)}$$

$\text{NH}_3$  yield rate was calculated using the following equation:

$$\text{NH}_3 \text{ yield rate} = [\text{NH}_4^+] \times V / (M_{\text{NH}_4^+} \times t \times m_{\text{cat.}}) \text{ (9)}$$

Where  $F$  is the Faradic constant ( $96485 \text{ C mol}^{-1}$ ),  $[\text{NH}_3]$  is the measured  $\text{NH}_3$  concentration,  $V$  is the volume of electrolyte in the anode compartment (35 mL),  $M_{\text{NH}_4^+}$  is the molar mass of  $\text{N NH}_4^+$ ,  $Q$  is the total quantity of applied electricity;  $t$  is the electrolysis time and  $m_{\text{cat.}}$  is the loaded mass of catalyst.

The electrochemical impedance spectroscopy (EIS) was conducted at 0.3 V vs. RHE from 100 KHz to 0.1 Hz.

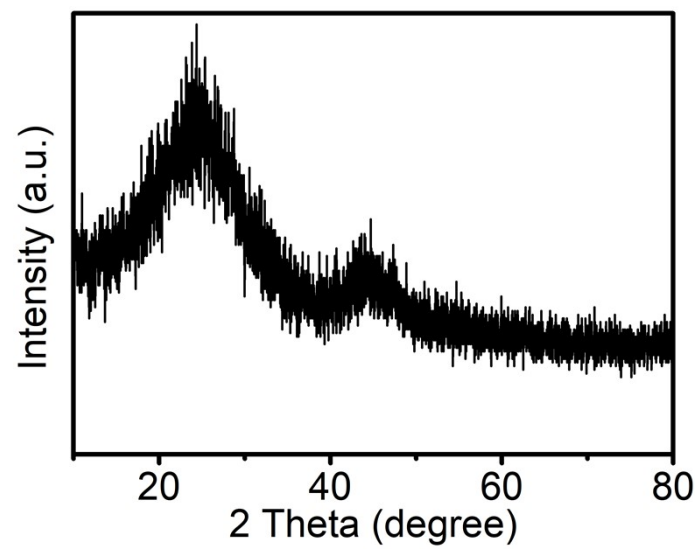

**Fig. S1.** XRD pattern of pure PP.

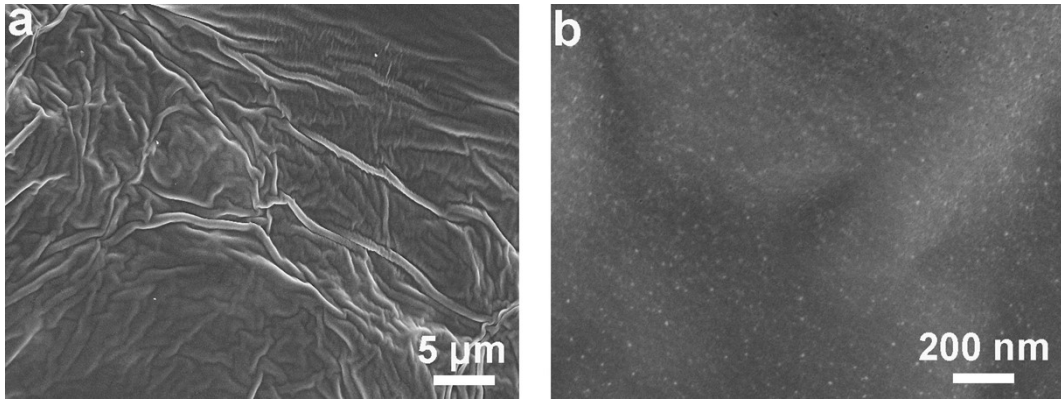

**Fig. S2.** SEM images of pure PP.

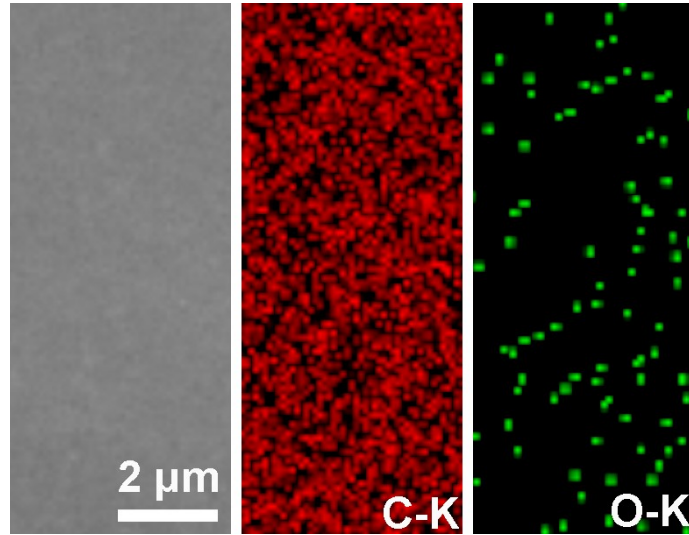

**Fig. S3.** SEM and EDX elemental mapping images of PP.

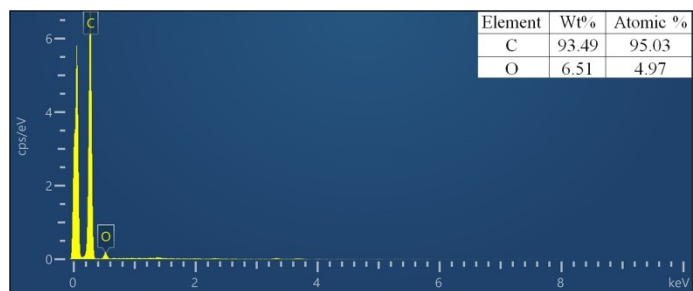

**Fig. S4.** EDX spectrum of PP.



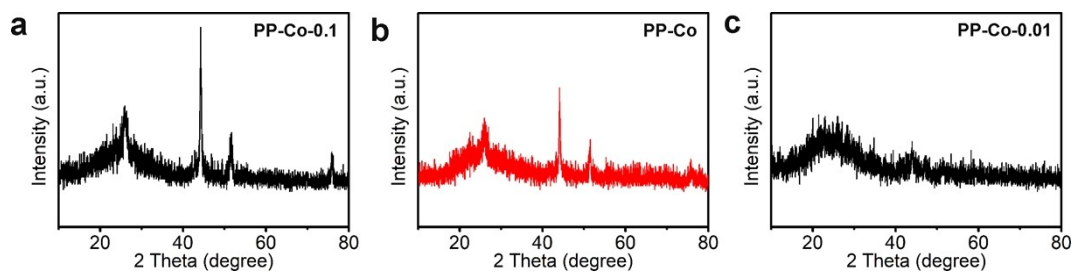

**Fig. S5.** XRD patterns of (a) PP-Co-0.1, (b) PP-Co, and (c) PP-Co-0.01.

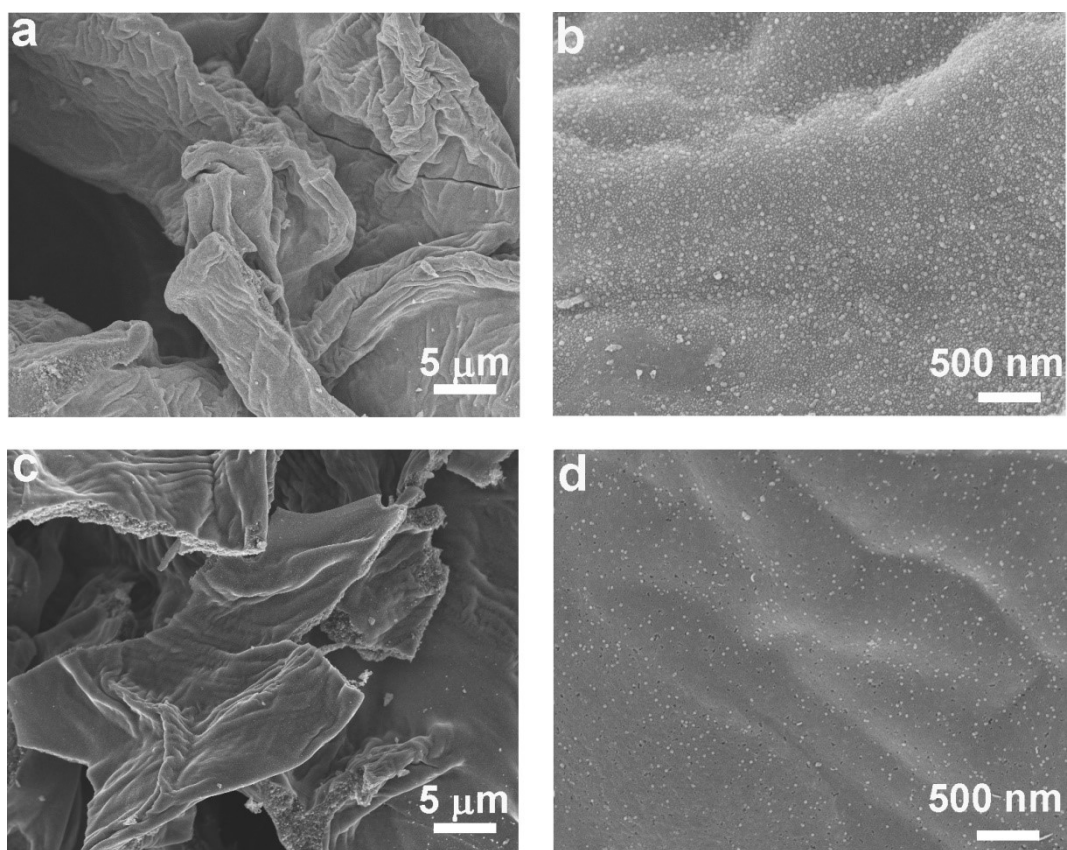

**Fig. S6.** SEM images of (a) and (b) PP-Co-0.1, (c) and (d) PP-Co-0.01.

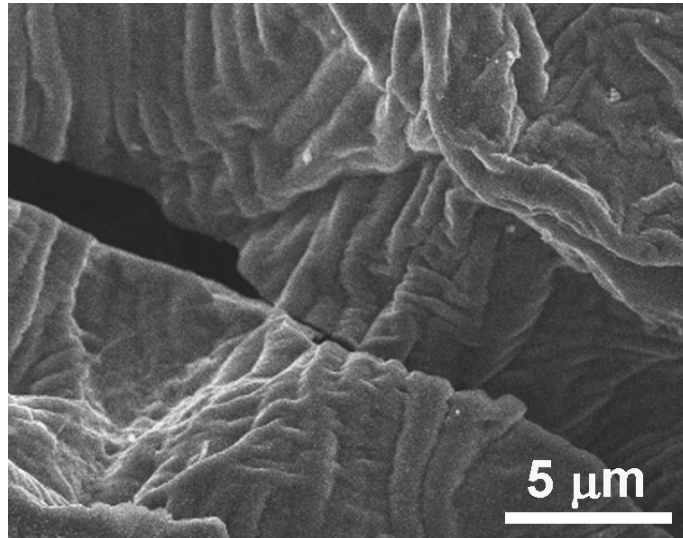

**Fig. S7.** SEM image of PP-Co.

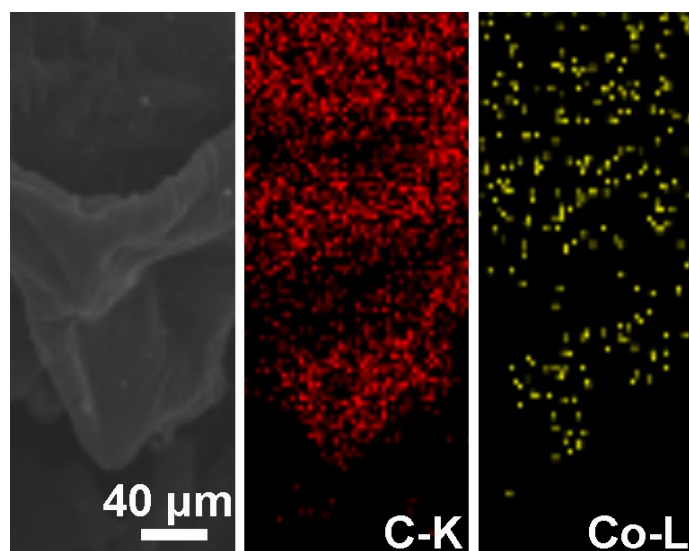

**Fig. S8.** SEM and EDX elemental mapping images of PP-Co.

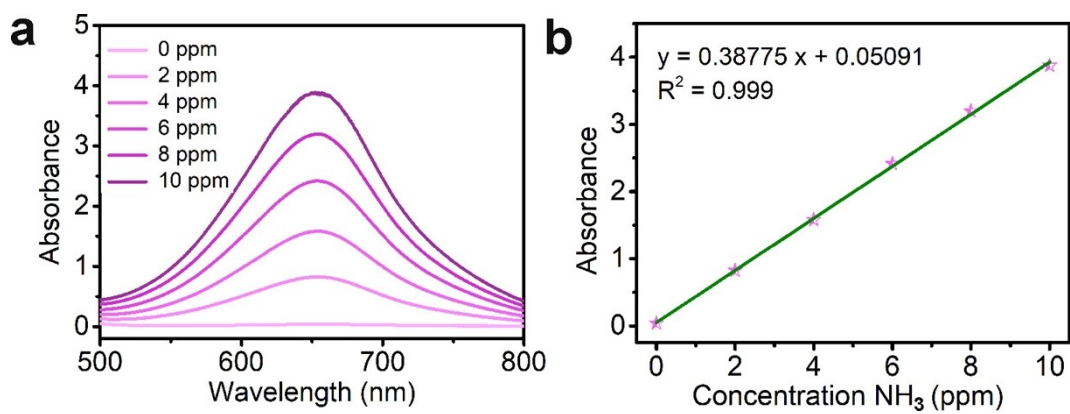

**Fig. S9.** (a) UV-Vis spectra and (b) corresponding calibration curve for determining  $\text{NH}_3$ .

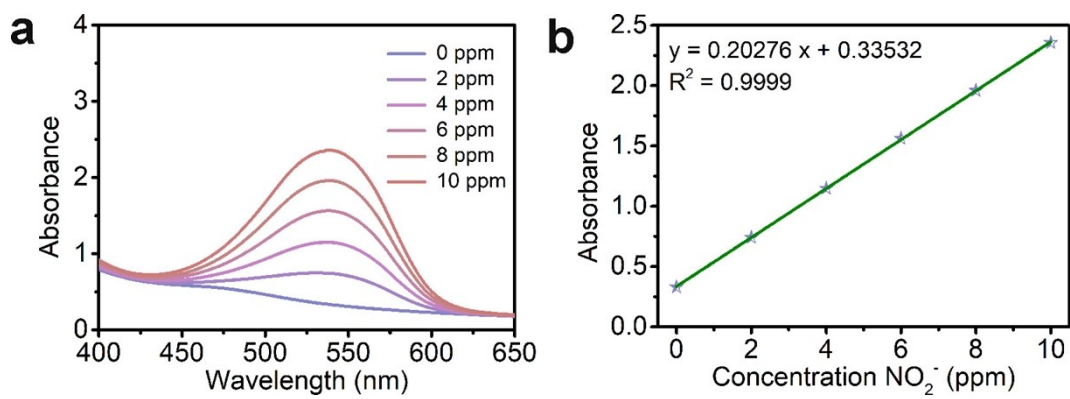

**Fig. S10.** (a) UV-Vis spectra and (b) corresponding calibration curve for determining  $\text{NO}_2^-$ .

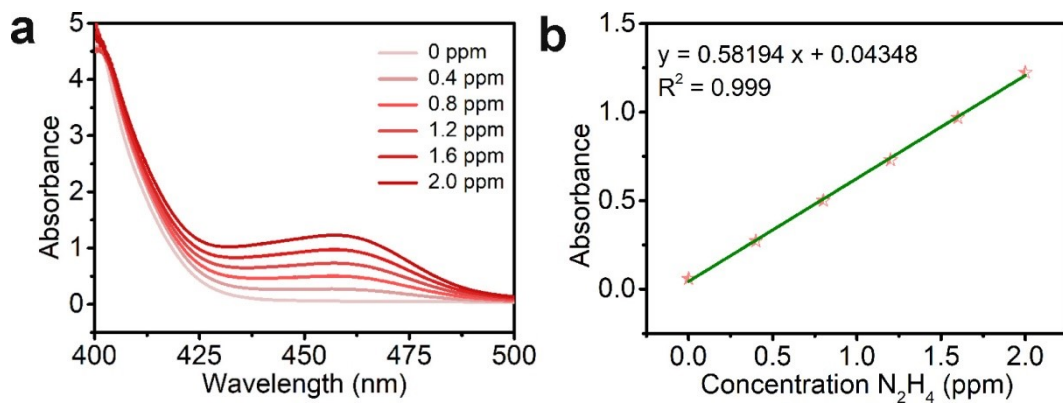

**Fig. S11.** (a) UV-Vis spectra and (b) corresponding calibration curve for determining  $N_2H_4$ .

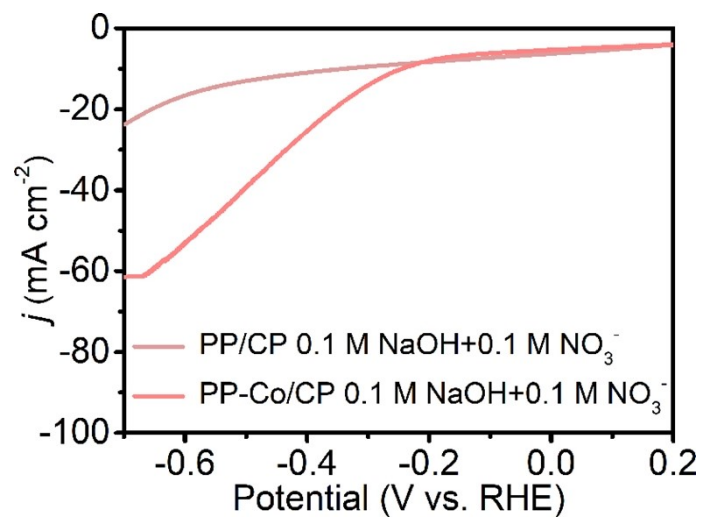

**Fig. S12.** LSV curves of pure PP/CP and PP-Co/CP tested in 0.1 M NaOH with 0.1 M NO<sub>3</sub><sup>-</sup>.



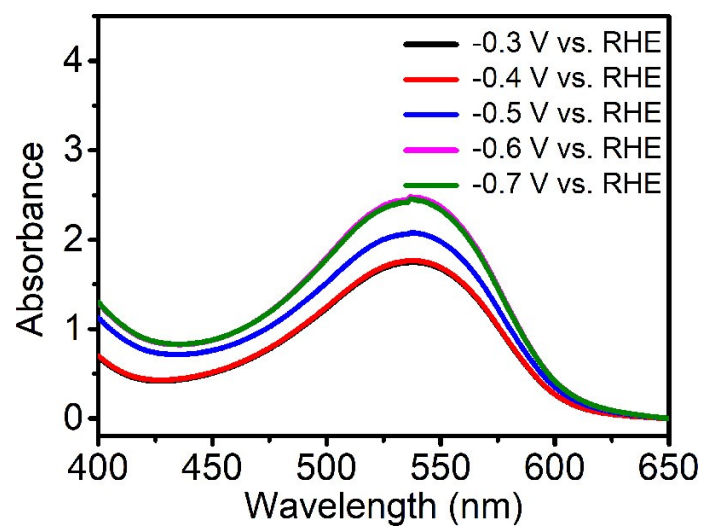

**Fig. S13.** UV-Vis spectra of electrogenerated  $\text{NO}_2^-$  for PP-Co/CP at different given potentials.

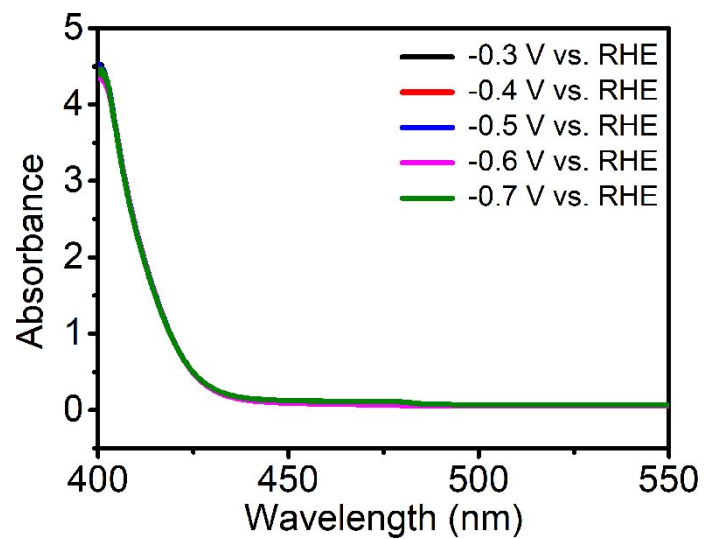

**Fig. S14.** UV-Vis spectra of electrogenerated  $N_2H_4$  for PP-Co/CP at different given potentials.

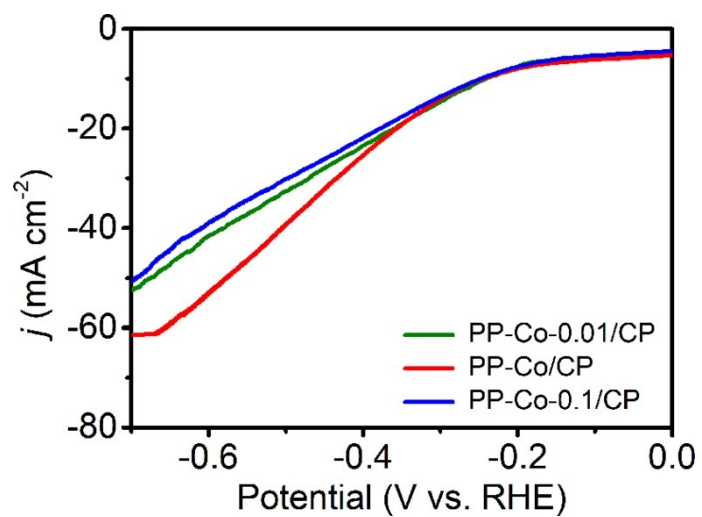

**Fig. S15.** LSV curves of PP-Co-0.01/CP, PP-Co/CP and PP-Co-0.1/CP tested in 0.1 M NaOH with 0.1 M NO<sub>3</sub><sup>-</sup>.

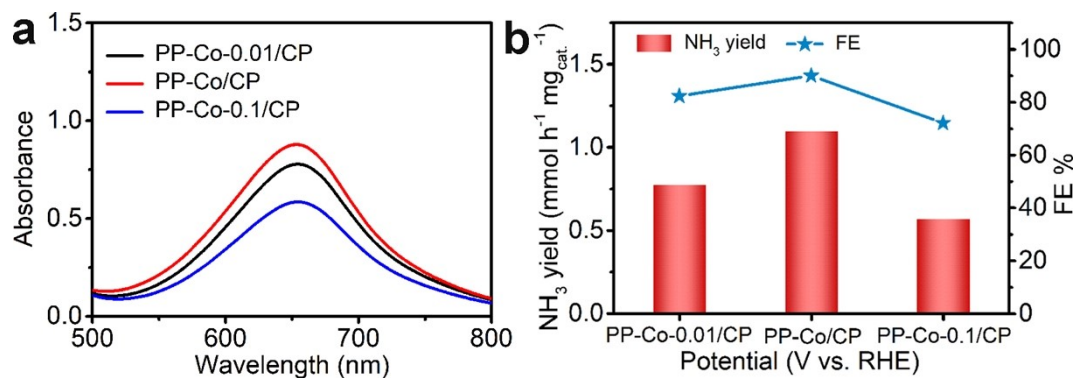

**Fig. S16.** (a) UV-Vis spectra of PP-Co-0.01/CP, PP-Co/CP, and PP-Co-0.1/CP for NO<sub>3</sub><sup>-</sup>RR. (b) NH<sub>3</sub> yields and FEs of PP-Co-0.01/CP, PP-Co/CP and PP-Co-0.1/CP at -0.6 V.

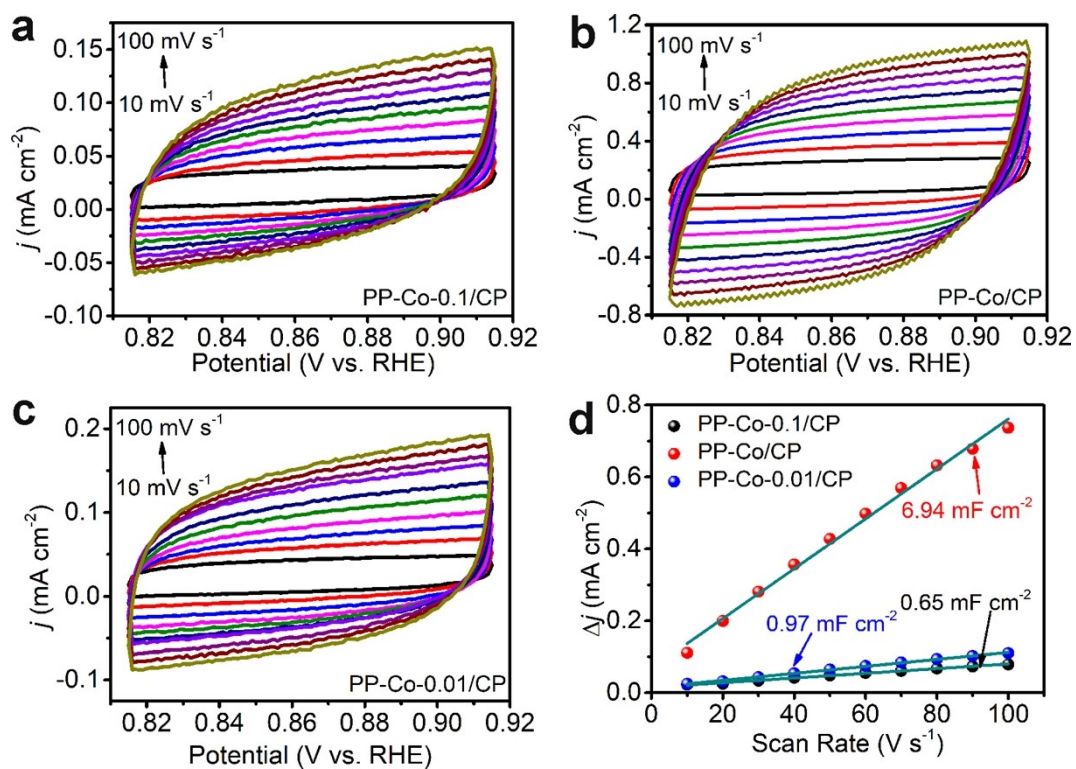

**Fig. S17.** CV curves for (a) PP-Co-0.1/CP, (b) PP-Co/CP, and (c) PP-Co-0.01/CP in the double layer region at scan rates of 10, 20, 30, 40, 50, 60, 70, 80, 90, and 100 mV s<sup>-1</sup> in 0.1 M NaOH with 0.1 M NO<sub>3</sub><sup>-</sup>. (d) Capacitive current as a function of scan rate at 0.865 V.

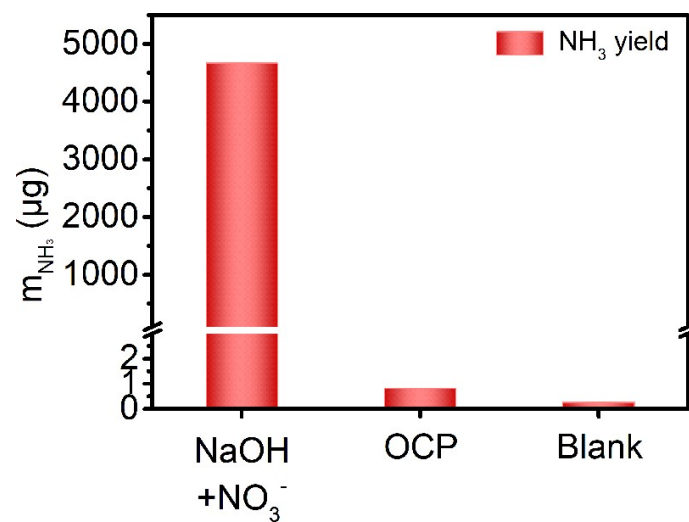

**Fig. S18.** Comparison of amount of produced NH<sub>3</sub> under three different conditions.

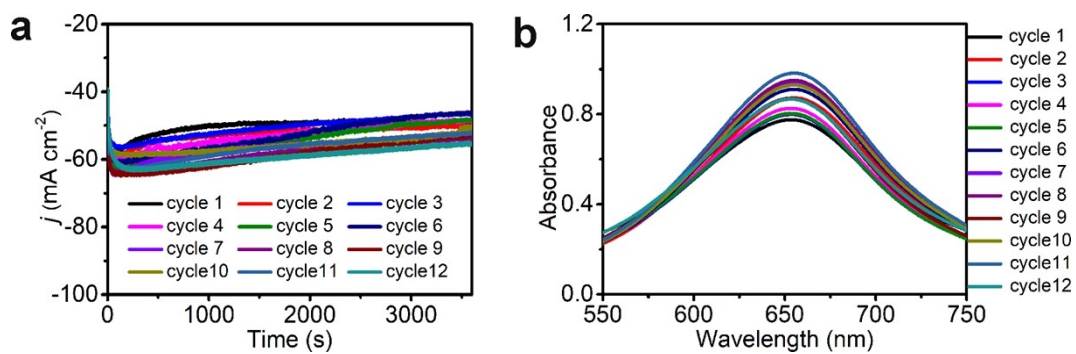

**Fig. S19.** (a) Time-dependent current density curves and (b) corresponding UV-Vis spectra of PP-Co/CP for electrogenerated NH<sub>3</sub> during recycling tests at -0.6 V vs. RHE in 0.1 M NaOH with 0.1 M NO<sub>3</sub><sup>-</sup>.

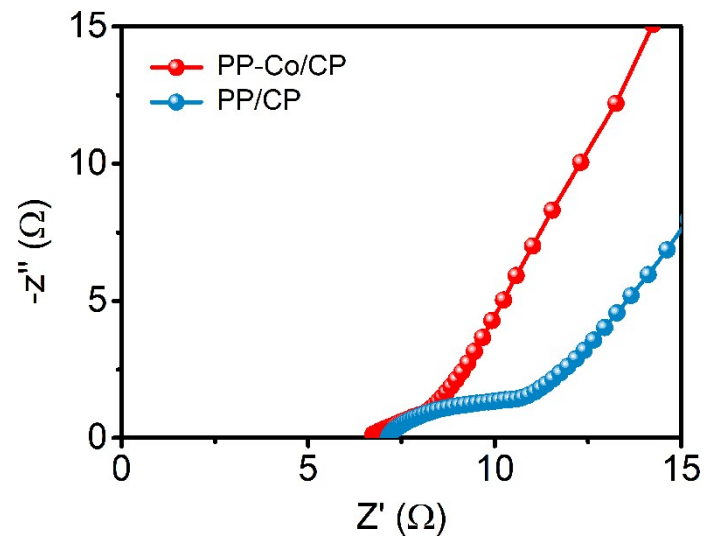

**Figure S20.** Nyquist plots of PP-Co/CP and PP/CP in 0.1 M NaOH with 0.1 M  $\text{NO}_3^-$ .



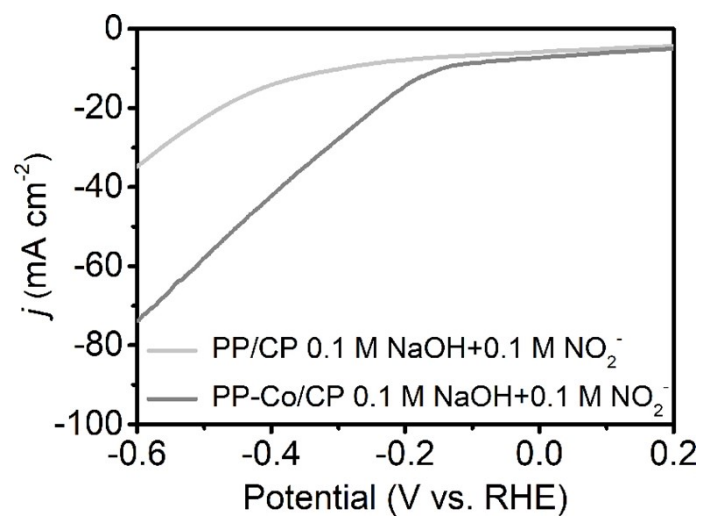

**Fig. S21.** LSV curves of pure PP/CP and PP-Co/CP tested in 0.1 M NaOH with 0.1 M NO<sub>2</sub><sup>-</sup>.

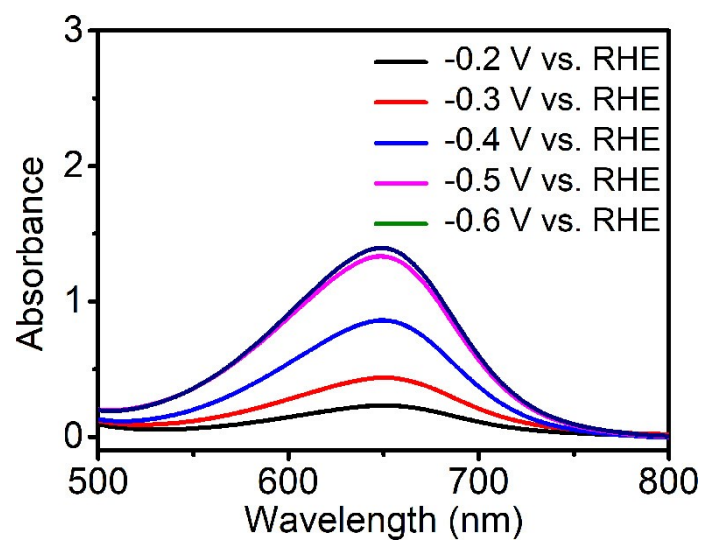

**Fig. S22.** UV-Vis spectra of PP-Co/CP for the NO<sub>2</sub><sup>-</sup>RR at different given potentials.

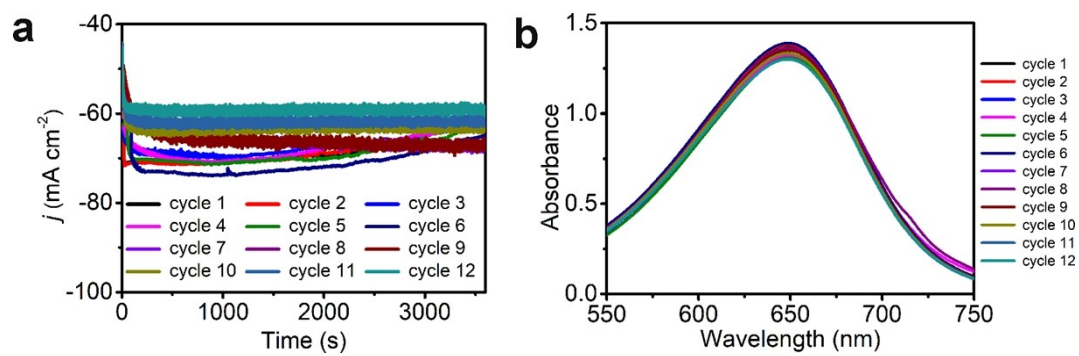

**Fig. S23.** (a) Time-dependent current density curves and (b) corresponding UV-Vis spectra of PP-Co/CP for electrogenerated NH<sub>3</sub> during recycling tests at  $-0.5$  V vs. RHE in 0.1 M NaOH with 0.1 M NO<sub>2</sub><sup>-</sup>.

**Table S1.** Comparison of catalytic performances of PP-Co/CP with other reported NO<sub>3</sub><sup>-</sup>RR electrocatalysts.

| Catalyst                                    | Electrolyte                                                                      | NH <sub>3</sub> yield rate@Potential<br>(V vs. RHE)                | FE@Potential<br>(%@V vs. RHE) | Ref.      |
|---------------------------------------------|----------------------------------------------------------------------------------|--------------------------------------------------------------------|-------------------------------|-----------|
| PP-Co/CP                                    | 0.1 M NaOH<br>(0.1 M NaNO <sub>3</sub> )                                         | 1.1 mmol h <sup>-1</sup> mg <sub>cat.</sub> <sup>-1</sup> @-0.6    | 90.1@-0.6                     | This work |
| Cu/Cu <sub>2</sub> O<br>NWAs                | 0.5 M Na <sub>2</sub> SO <sub>4</sub><br>(200 ppm NO <sub>3</sub> <sup>-</sup> ) | 4.1633 mg h <sup>-1</sup> cm <sup>-2</sup> @-0.85                  | 95.8@-0.85                    | 2         |
| Cu nanosheets                               | 0.1 M KOH<br>(10 mM KNO <sub>3</sub> )                                           | 0.023 mmol h <sup>-1</sup> mg <sub>cat.</sub> <sup>-1</sup> @-0.15 | 99.7@-0.15                    | 4         |
| PTCDA/O-Cu                                  | 0.1 M PBS<br>(500 ppm NO <sub>3</sub> <sup>-</sup> )                             | 0.436±0.085 mg h <sup>-1</sup> cm <sup>-2</sup> @-0.4              | 85.9@-0.4                     | 5         |
| Fe SAC                                      | 0.10 M K <sub>2</sub> SO <sub>4</sub><br>(0.5 M NO <sub>3</sub> <sup>-</sup> )   | 7.82 mg h <sup>-1</sup> cm <sup>-2</sup> @-0.85                    | 75@-0.66                      | 6         |
| Co <sub>3</sub> O <sub>4</sub> @NiO<br>HNTs | 0.5 M Na <sub>2</sub> SO <sub>4</sub><br>(200 ppm NO <sub>3</sub> <sup>-</sup> ) | 0.069 mmol h <sup>-1</sup> mg <sub>cat.</sub> <sup>-1</sup> @-0.7  | 54.97@-0.7                    | 7         |
| TiO <sub>2-x</sub>                          | 0.5 M Na <sub>2</sub> SO <sub>4</sub><br>(50 ppm NO <sub>3</sub> <sup>-</sup> )  | 0.765 mg h <sup>-1</sup> cm <sup>-2</sup> @-0.95                   | 85@-0.95                      | 8         |
| Cu                                          | 1 M NaOH<br>(0.1 M NaNO <sub>3</sub> )                                           | /                                                                  | 79                            | 9         |
| Cu <sub>50</sub> Ni <sub>50</sub>           | 1 M KOH<br>(10 mM KNO <sub>3</sub> )                                             | /                                                                  | 84 ± 2                        | 10        |
| Ti/GC                                       | KOH (~0.1 to 0.6<br>M NO <sub>3</sub> <sup>-</sup> )                             | /                                                                  | 82                            | 11        |
| Co/CoO NSA                                  | 0.1 M Na <sub>2</sub> SO <sub>4</sub><br>(200 ppm NO <sub>3</sub> <sup>-</sup> ) | 3.3058 mg h <sup>-1</sup> cm <sup>-2</sup> @-0.65                  | 93.8@-0.65                    | 12        |
| Ni <sub>3</sub> B@NiB <sub>2.74</sub>       | 0.1 M KOH<br>(0.01 M NO <sub>3</sub> <sup>-</sup> )                              | 0.194 mmol h <sup>-1</sup> cm <sup>-2</sup> @-0.3                  | 100@-0.3                      | 13        |
| FC                                          | 0.05 M H <sub>2</sub> SO <sub>4</sub><br>(200 ppm KNO <sub>3</sub> )             | 0.0238 mmol h <sup>-1</sup> mg <sub>cat.</sub> <sup>-1</sup> @-0.7 | 20@-0.65                      | 14        |

|          |                                                                                    |                                                                    |             |    |
|----------|------------------------------------------------------------------------------------|--------------------------------------------------------------------|-------------|----|
| PCNV-600 | 0.5 M Na <sub>2</sub> SO <sub>4</sub><br>(100 ppm NO <sub>3</sub> <sup>-</sup> -N) | 0.033 mmol h <sup>-1</sup> mg <sub>cat.</sub> <sup>-1</sup> @-0.95 | 29.96@-0.95 | 15 |
| In-S-G   | 1 M KOH<br>(0.1 M KNO <sub>3</sub> )                                               | 0.22 mmol h <sup>-1</sup> mg <sub>cat.</sub> <sup>-1</sup> @-0.7   | 75@-0.5     | 16 |
| CoP NRs  | 0.5 M Na <sub>2</sub> SO <sub>4</sub><br>(50 mM NaNO <sub>3</sub> )                | 1.77 mmol h <sup>-1</sup> mg <sub>cat.</sub> <sup>-1</sup> @-0.5   | 97.1@-0.5   | 17 |

**Table S2.** Comparison of catalytic performances of PP-Co/CP with other reported NO<sub>2</sub><sup>-</sup>RR electrocatalysts.

| Catalyst                | Electrolyte                                                                      | NH <sub>3</sub> yield rate@Potential<br>(V vs. RHE)              | FE@Potential<br>(%@V vs. RHE) | Ref.      |
|-------------------------|----------------------------------------------------------------------------------|------------------------------------------------------------------|-------------------------------|-----------|
| PP-Co/CP                | 0.1 M NaOH<br>(0.1 M NaNO <sub>2</sub> )                                         | 1.68 mmol h <sup>-1</sup> mg <sub>cat.</sub> <sup>-1</sup> @-0.5 | 86.8@-0.5                     | This work |
| Ni-NSA-V <sub>Ni</sub>  | 0.2 M Na <sub>2</sub> SO <sub>4</sub><br>(200 ppm NO <sub>2</sub> <sup>-</sup> ) | 4.01 mg h <sup>-1</sup> cm <sup>-2</sup> @-0.55                  | 88.9@-0.55                    | 18        |
| CoP NA/TM               | 0.1 M PBS<br>(500 ppm NO <sub>2</sub> <sup>-</sup> )                             | 2.26 mg h <sup>-1</sup> cm <sup>-2</sup> @-0.2                   | 90@-0.2                       | 19        |
| Ni <sub>2</sub> P/NF    | 0.1 M PBS<br>(200 ppm NO <sub>2</sub> <sup>-</sup> )                             | 2.69 mg h <sup>-1</sup> cm <sup>-2</sup> @-0.85                  | 90@-0.66                      | 20        |
| Co-P/TP                 | 0.2 M Na <sub>2</sub> SO <sub>4</sub><br>(200 ppm NO <sub>2</sub> <sup>-</sup> ) | 0.66 mg h <sup>-1</sup> cm <sup>-2</sup> @-0.6                   | 93.3@-0.2                     | 21        |
| Cu <sub>3</sub> P NA/CF | 0.1 M PBS<br>(0.1 M NO <sub>2</sub> <sup>-</sup> )                               | 1.63 mg h <sup>-1</sup> cm <sup>-2</sup> @-0.5                   | 91.2@-0.5                     | 22        |

## References

- 1 D. Zhu, L. Zhang, R. E. Ruther and R. J. Hamers, *Nat. Mater.*, 2013, **12**, 836–841.
- 2 Y. Wang, W. Zhou, R. Jia, Y. Yu and B. Zhang, *Angew. Chem., Int. Ed.*, 2020, **59**, 5350–5354.
- 3 G. W. Watt and J. D. Chrisp, *Anal. Chem.*, 1952, **24**, 2006–2008.
- 4 X. Fu, X. Zhao, X. Hu, K. He, Y. Yu, T. Li, Q. Tu, X. Qian, Q. Yue, M. Wasielewski and Y. Kang, *Appl. Mater. Today*, 2020, **19**, 100620.
- 5 G. Chen, Y. Yuan, H. Jiang, S. Ren, L. Ding, L. Ma, T. Wu, J. Lu and H. Wang, *Nat. Energy*, 2020, **5**, 605–613.
- 6 Z. Wu, M. Karamad, X. Yong, Q. Huang, D. A. Cullen, P. Zhu, C. Xia, Q. Xiao, M. Shakouri, F. Chen, J. Y. Kim, Y. Xia, K. Heck, Y. Hu, M. S. Wong, Q. Li, I. Gates, S. Siahrostami and H. Wang, *Nat. Commun.*, 2021, **12**, 2870.
- 7 Y. Wang, C. Liu, B. Zhang and Y. Yu, *Sci. China Mater.*, 2020, **63**, 2530–2538.
- 8 R. Jia, Y. Wang, C. Wang, Y. Ling, Y. Yu and B. Zhang, *ACS Catal.*, 2020, **10**, 3533–3540.
- 9 D. Reyter, G. Chamoulaud, D. Bélanger and L. Roué, *J. Electroanal. Chem.*, 2006, **596**, 13–24.
- 10 Y. Wang, A. Xu, Z. Wang, L. Huang, J. Li, F. Li, J. Wicks, M. Luo, D. H. Nam, C. Tan, Y. Ding, J. Wu, Y. Lum, C. T. Dinh, D. Sinton, G. Zheng and E. H. Sargent, *J. Am. Chem. Soc.*, 2020, **142**, 5702–5708.
- 11 J. M. McEnaney, S. J. Blair, A. C. Nieland, J. A. Schwalbe, D. M. Koshy, M. Cargnello and T. F. Jaramillo, *ACS Sustainable Chem. Eng.*, 2020, **8**, 2672–2681.
- 12 Y. Yu, C. Wang, Y. Yu, Y. Wang and B. Zhang, *Sci. China Chem.*, 2020, **63**, 1469–1476.
- 13 L. Li, C. Tang, X. Cui, Y. Zheng, X. Wang, H. Xu, S. Zhang, T. Shao, K.

- Davey and S. Qiao, *Angew., Chem. Int. Ed.*, 2021, **60**, 14131–14137.
- 14 Y. Li, S. Xiao, X. Li, C. Chang, M. Xie, J. Xu and Z. Yang, *Mater. Today Phys.*, 2021, **19**, 100431.
- 15 Y. Huang, J. Long, Y. Wang, N. Meng, Y. Yu, S. Lu, J. Xiao and B. Zhang, *ACS Appl. Mater. Interfaces*, 2021, **13**, 54967–54973.
- 16 F. Lei, W. Xu, J. Yu, K. Li, J. Xie, P. Hao, G. Cui and B. Tang, *Chem. Eng. J.*, 2021, **426**, 131317.
- 17 Q. Hong, J. Zhou, Q. Zhai, Y. Jiang, M. Hu, X. Xiao, S. Li and Y. Chen, *Chem. Commun.*, 2021, **57**, 11621–11624.
- 18 C. Wang, W. Zhou, Z. Sun, Y. Wang, B. Zhang and Y. Yu, *J. Mater. Chem. A*, 2021, **9**, 239–243.
- 19 G. Wen, J. Liang, Q. Liu, T. Li, X. An, F. Zhang, A. A. Alshehri, K. A. Alzahrani, Y. Luo, Q. Kong and X. Sun, *Nano Res.*, 2022, **15**, 972–977.
- 20 G. Wen, J. Liang, L. Zhang, T. Li, Q. Liu, X. An, X. Shi, Y. Liu, S. Gao, A. M. Asiri, Y. Luo, Q. Kong and X. Sun, *J. Colloid. Interf. Sci.*, 2022, **606**, 1055–1063.
- 21 Z. Li, G. Wen, J. Liang, T. Li, Y. Luo, Q. Kong, X. Shi, A. M. Asiri, Q. Liu and X. Sun, *Chem. Commun.*, 2021, **57**, 9720–9723.
- 22 J. Liang, B. Deng, Q. Liu, G. Wen, Q. Liu, T. Li, Y. Luo, A. A. Alshehri, K. A. Alzahrani, D. Ma and X. Sun, *Green Chem.*, 2021, **23**, 5487–5493.
